# Supplementary material for: The high-affinity HSP90-CHIP complex recognizes and selectively degrades phosphorylated tau client proteins
Source: JCI journal article supplement (doi:10.1172/jci29715), 2007-02-15
Supplement: sd1 [file 1]

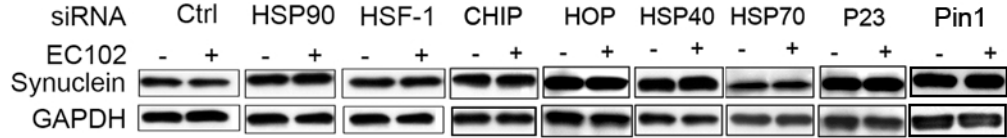

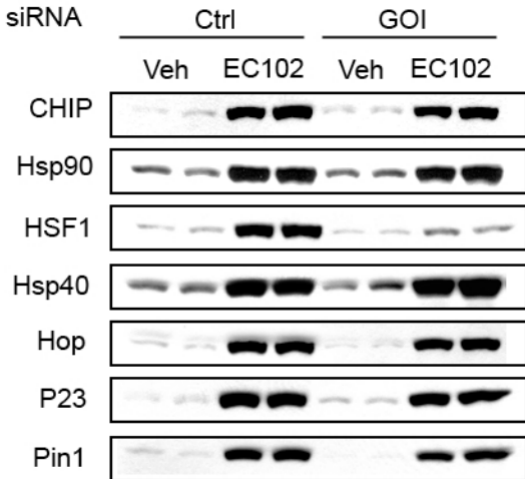

*Supplementary Figure 1. EC102 does not affect over-expressed alpha-synuclein.*

HeLa cells were transfected with a non-silencing control (Ctrl), Hsp90, HSF1, CHIP, HOP, Hsp40, Hsp70, P23 or Pin1 siRNA pools, and incubated for 72 hours. The cells were then transfected with a pcDNA3.1 vector containing synuclein and harvested after 24-hour EC102 exposure. EC102 had no effect on synuclein levels. Suppression of each of the specified siRNAs also had no effect on synuclein accumulation compared with the Ctrl siRNA. The only apparent exception was that Hsp70 siRNA slightly reduced synuclein levels.

*Supplementary Figure 2. With the exception of HSF1 and Hsp70, Hsp70 levels are unaffected by siRNAs targeting other chaperones.*

HeLa cells were transfected in duplicate with a non-silencing control (Ctrl) or the indicated siRNA pools targeting genes of interest (GOI), and incubated for 72 hours. The cells were then transfected with V5-tau and harvested after 24-hour EC102 exposure. Only HSF1 and Hsp70 prevented Hsp70 induction, while suppression of all other genes had no effect on Hsp70 protein levels compared to Ctrl.
